# Supplementary material for: The C-Type Lectin Receptor Dectin-2 Is a Receptor for Aspergillus fumigatus Galactomannan
Source: PubMed Central journal article supplement (PMC9973300; doi:10.1128/mbio.03184-22), 2023-01-04
Supplement: mbio.03184-22-s0001.pdf [file mbio.03184-22-s0001.pdf]

1 **Supplemental Methods:**

2

3 ***Generation and quality control of FLP***

4 Carbohydrate coated-FLP consisting of purified  $\beta$ -1,3 glucan (Wellmune, Biothera,  
5 *Saccharomyces cerevisiae*, Egan, MN) and mannan (*S. cerevisiae*, Sigma-Aldrich,  
6 M704-1G) were creating using previously published methods (1). Using purified  
7 *Aspergillus fumigatus* galactomannan, we created both adsorbed FLP in which the  
8 carbohydrate is attached to the bead through electrostatic interactions and covalently-  
9 attached FLP using 1,1'-carbonyldiimidazole (CDI)-chemistry as previously published  
10 (1). Briefly, 300 mL of amine-coated polystyrene beads (Polysciences, Warrington, PA)  
11 were washed three times in sterile anhydrous dimethylsulfoxide (DMSO, Millipore  
12 Sigma, Burlington, MA) using 0.45  $\mu$ m PTFE centrifugal filters (Millipore Sigma,  
13 Burlington, MA) to remove any aqueous solution. The beads were then resuspended in  
14 either DMSO (adsorbed beads) or DMSO containing 0.5 M 1,1'-carbonyldiimidazole  
15 (CDI) and incubated at room temperature for 1 hour with shaking. Beads were then  
16 rinsed with DMSO and resuspended in 1mg/mL purified *A. fumigatus* galactomannan in  
17 DMSO. Unmodified beads were resuspended just in DMSO without additional  
18 carbohydrates. The mixture was incubated for 1 hour at room temperature with shaking  
19 and centrifuged to remove the DMSO and excess carbohydrates. Beads were then  
20 washed, and resuspended in PBS, counted on a Luna™ automated cell counter (Logos  
21 Biosystems, Annandale, VA), and stored at 4°C.

22 To confirm the association of carbohydrates with the FLPs and ensure rigor,  
23 each newly created batch of FLPs was analyzed by flow cytometry. Briefly, 3 mL of

24 beads were blocked overnight in PBS containing 2% BSA at 4°C. To analyze mannan  
25 binding to the surface, 10 mL of 20 mg/mL stock fluorescein labeled Concanavalin A  
26 (Con A; Invitrogen, Thermo Fisher Scientific, Carlsbad, CA; C827) was added to each  
27 sample and incubated for 1 hour at room temperature while shaking. Samples were  
28 washed and resuspended in FACS buffer (PBS containing 2% BSA) and then analyzed  
29 on a BD FACSCalibur™ or BD FACSCelesta™ Flow Cytometer (BD, Franklin Lakes,  
30 NJ). For analysis of  $\beta$ -1,3 glucan, 20 ng of primary monoclonal anti- $\beta$ -1,3 glucan  
31 antibody (Biosupplies Australia Pty LTD, Victoria, Australia; 400-2) was added to each  
32 sample and incubated for 1 hour at room temperature. FLPs were washed and then  
33 incubated for 30 minutes with a 1:100 dilution of secondary rabbit anti-mouse IgG  
34 conjugated with Alexa Fluor 488 (Invitrogen, Carlsbad, CA; A11059). FLPs were then  
35 washed, resuspended in FACS buffer, and analyzed by flow cytometry. For  
36 galactomannan-coated beads, FLPs were centrifuged, and the blocking buffer was  
37 removed. FLPs were resuspended in 50 ml of component R6 from the Platelia  
38 *Aspergillus* Ag kit (Bio-Rad, Hercules, CA) containing rat anti-galactomannan IgM  
39 antibody and were incubated for 1 hour at room temperature. FLPs were then washed  
40 and resuspended in a 1:200 dilution of secondary goat anti-rat IgM conjugated with  
41 Alexa Fluor 488 (Invitrogen, Carlsbad, CA; A-21212) in FACs Buffer. FLPs were  
42 incubated for 30 minutes at room temperature and then washed and resuspended in  
43 FACS buffer.

44 To assess the stability of carbohydrate association, 10 mL of FLP were incubated  
45 in 800 mL of either 3% SDS, 1X NP40, 1% Triton X-100 for 1 hour at room temperature  
46 with constant shaking, or 3% SDS at 95°C for 1 hour. The FLPs were centrifuged,

47 washed with detergent, and washed three times with FACS buffer. FLPs were then  
48 subjected to antibody staining to assess for carbohydrate association as detailed above.

49 For fluorescent imaging of carbohydrate coated FLPs, FLPs were fluorescently  
50 labeled in the same manner as for flow cytometry and then placed onto glass slides.  
51 FLPs were imaged using a Nikon Ti-E inverted microscope with a CSU-X1 confocal  
52 spinning-disk head (Yokogawa, Sugarland, TX) with a Coherent 4-Watt laser (Coherent,  
53 Santa Clara, CA) as the excitation source. Images were acquired through an EM-CCD  
54 camera (Hamamatsu, C9100-13, Bridgewater, NJ) and performed using MetaMorph®  
55 software (Molecular Devices, Downingtown, PA). Image data files were processed using  
56 Adobe Photoshop 2021 and assembled in Adobe Illustrator 2022 (Adobe Systems, San  
57 Jose, CA).

58

### 59 ***Lentiviral transduction of cells with Dectin-2 and FcR $\gamma$***

60 Murine Dectin-2 was amplified from plasmid pFB-dectin2-IRES-eGFP from Caetano  
61 Reis e Sousa (London Research Institute, London, U.K.) using a 5' primer containing  
62 NotI digestion site with sequence

63 TATTGCGGCCGCCATGGTGCAGGAAAGACAATCCCAAGG and a 3' primer

64 containing a BglII restriction site with sequence

65 TCGACGATAGATCTTCATAGGTAAATCTTCTTCATTTACATATTGAATTG. Primers  
66 were synthesized by Integrated DNA technologies (IDT, Research Triangle Park, NC).

67 The gamma chain protein (FcR $\gamma$ ) of the Fc-gamma receptor (Fc $\gamma$ R) was PCR amplified  
68 from plasmid pSVL-mo Fc $\epsilon$ RI gamma (plasmid was a gift from Jean Kinet, Addgene  
69 plasmid #8372), using 5' primer containing a NotI digestion site with sequence

70 TATTGCGGCCGCCATGATCTCAGCCGTGATCTTGTCTTG and 3' primer containing  
71 a BamHI digestion site TCGACGATGGATCCCTACTGGGGTGGTTTTTCATGCTTC.  
72 The constructs were cloned into a pHAGEII lentiviral vector containing either puromycin  
73 or blasticidin selectable markers using NotI and BamHI digestion and sequence verified.  
74 Generation of lentivirus in HEK293T cells and transduction was performed as previously  
75 described (2). Cells were selected for uptake of the lentivirus vector using puromycin or  
76 blasticidin at 5 µg/mL. After selection, expression of the desired gene was confirmed  
77 using western blot. Surface localization of Dectin-2 was confirmed using flow cytometry  
78 using anti-murine Dectin-2-APC (R&D Systems, Minneapolis, MN, FAB1515A) or anti-  
79 human Dectin-2 polyclonal goat antibody (R&D, AF3114) with Donkey anti-Goat AF488  
80 secondary antibody (Invitrogen, Thermo Fisher Scientific, Rockford, IL, A11055).

81

### 82 ***CLR ligand reporter cell assay***

83 Reporter cells were used based on previously published protocols (3). B3Z and BWZ  
84 cells carrying an NFAT-lacZ reporter construct have been previously described (4, 5).  
85 B3Z cells expressing murine Dectin-2 or a wildtype murine FCR $\gamma$ -chain as well as BWZ  
86 cells expressing murine Dectin-1CD3 $\zeta$  (the extracellular domain of mouse Dectin-1  
87 fused to CD3 $\zeta$  intracellular tail) were constructed by Dr. Caetano Reis e Sousa (6).  
88 Mincle and Dectin-3 (MCL) expressing cells were created as previously described (3).  
89 Briefly, cells were seeded at  $1 \times 10^5$  cells per well in 96-well plates followed by  
90 stimulation with FLPs or media alone. Cells were incubated for 18 hours in a tissue  
91 culture incubator at 37°C with 5% CO<sub>2</sub>. Cells were pelleted and the supernatant was  
92 removed. Cells were lysed with triton lysis buffer (1% Triton X-100, 9 mM KH<sub>2</sub>PO<sub>4</sub>, 90

93 mM K<sub>2</sub>HPO<sub>4</sub>) on ice for 30 minutes. Plates were centrifuged to pellet cellular debris and  
94 40 mL of lysate was transferred to a new 96-well plate. Assay buffer containing  
95 chlorophenol red-β-D-galactopyranoside (CPRG) was added to each well and plates  
96 were incubated for 6 hours at 37°C protected from light and then absorbance at 560 nm  
97 and 620 nm was measured using an i3x Spectrophotometer (Molecular Devices LLC,  
98 San Jose, CA).

99

### 100 ***Fungal Fc Protein Binding Assays***

101 *A. fumigatus* resting conidia, swollen conidia and early germlings were grown as  
102 previously described in 8-well Nunc™ Lab-Tek® II Chambered Coverglass (Thermo  
103 Fisher Scientific, Rockford, IL). Fungi was washed with PBS and then blocked by  
104 incubated in PBS containing 1% BSA for 1 hour at 4<sup>0</sup>C. *Aspergillus* was then washed  
105 and resuspended in 200 μL of binding buffer (20 mM Tris-HCL, pH 7.4, 150 mM NaCl,  
106 10 mM CaCl<sub>2</sub>, 0.05% Tween-20). Dectin-2(murine)- IgG1 Fc (human) fusion protein  
107 (ENZO Life Sciences, Inc, Farmingdale, NY) or IgG1 Fc (human) protein (Thermo  
108 Fisher Scientific, Rockford, IL) was added to a final concentration of 10 μg/mL and  
109 samples were incubated with gentle mixing for 1 hours at 4<sup>0</sup>C. Following washing,  
110 samples were resuspended in binding buffer containing a 1:500 dilution of anti-human-  
111 IgG1-Fc conjugated to Alexa Fluor 647 (BioLegend, San Diego, CA; 410713) and  
112 incubated for 30 minutes at 4<sup>0</sup>C in the dark. Samples were washed and resuspended in  
113 binding buffer and were imaged using a Nikon Ti-E inverted microscope with a CSU-X1  
114 confocal spinning-disk head (Yokogawa, Sugarland, TX) with a Coherent 4-Watt laser  
115 (Coherent, Santa Clara, CA) as the excitation source. Images were acquired through

116 an EM-CCD camera (Hamamatsu, C9100-13, Bridgewater, NJ) and using MetaMorph®  
117 software (Molecular Devices, Downingtown, PA). Image data files were processed using  
118 Adobe Photoshop 2021 and assembled in Adobe Illustrator 2022 (Adobe Systems, San  
119 Jose, CA).

120

### 121 ***Western blot***

122 Cells were placed on ice and lysed with 1% NP40 lysis buffer containing protease and  
123 phosphatase inhibitors. Proteins were denatured using NuPAGE LDS Sample Buffer  
124 (Thermo Fisher Scientific, Rockford, IL). The proteins were resolved by SDS-PAGE on  
125 4-12% NuPAGE gels using NuPAGE MOPS buffer (NuPage gels, Thermo Fisher  
126 Scientific, Rockford, IL), and transferred to methanol-activated PVDF membrane (Perkin  
127 Elmer, Waltham, MA) using transfer buffer (0.025M Tris, 0.192 M glycine, 20%  
128 methanol) and electrophoretic transfer at 100V for 1 hour. For detection of proteins,  
129 PVDF membranes were blocked for 1 hour at room temperature in 5% BSA in PBS-  
130 0.01% Tween 20 (PBST). Blots were incubated with anti-phospho spleen tyrosine  
131 kinase (Syk) antibody (Cell Signaling Technologies, Danvers, MA; 2710S) or anti-total  
132 Syk antibody (Cell Signaling Technologies, 13198S), in 5% BSA in PBST overnight at  
133 4°C. The membranes were washed and incubated with secondary swine anti-rabbit HRP  
134 conjugated antibody (Agilent DAKO, Santa Clara, CA, P0399) in 1% milk in PBST for 1  
135 hour at room temperature. Membranes were washed and then visualized using Western  
136 Lightning Plus ECL chemiluminescent substrate (Perkin Elmer, Waltham, MA) on Kodak  
137 BioMax XAR film (MilliporeSigma, Burlington, MA). Films were then scanned and

138 processed using Adobe Photoshop 2021. Any contrast adjustments were applied evenly  
139 to the entire image and adheres to standards set forth by the scientific community (7).

140

#### 141 ***Transcriptional Analysis***

142 Wildtype and Dectin-2 expressing immortalized C57BL/6 macrophages were plated at 150,000  
143 cells / well in 12 well cell-culture plates in complete RPMI media. Macrophages were either  
144 unstimulated or stimulated with Galactomannan FLP at a target to effector ration of 30:1 for 6  
145 hours. Following stimulation, media was removed from the wells and the cells were lysed with  
146 Qiagen RLT Buffer (Qiagen, Germantown, MD) containing  $\beta$ -mercaptoethanol, passed through  
147 a QIAshredder Column and RNA isolated using the Qiagen RNeasy Kit according to the  
148 manufacturers instructions. Concentration of the RNA was quantified using a NanoDrop™ One  
149 Microvolume UV-Vis Spectrophotometer (Thermo Fisher Scientific, Rockford, IL).

150 NanoString (nanoString, Seattle, WA) profiling of transcriptional responses was  
151 performed using the nCounter® Host Response Panel according to manufacturers instructions.  
152 Total RNA (25 ng) was used for hybridization reactions at 65°C for 24 hours. The hybridized  
153 samples were loaded on the nCounter® Cartridge and analyzed using a nCounter® Sprint  
154 Profiler. The resulting data was analyzed using the nSolver analysis software. Negative  
155 controls were used for background subtraction. Positive cartridge controls as well as  
156 housekeeping genes (with counts greater than 100) were used for data normalization. The  
157 nSolver® Advance Analysis 2.0 was used to analyze gene expression data for the following  
158 comparisons: Dectin-2<sup>OE</sup> macrophages stimulated with GALM FLP versus baseline of  
159 unstimulated and Wild -type macrophages stimulated with GALM FLP versus baseline of  
160 unstimulated. Genes with counts < 20 were excluded from the analysis, leaving a total of 443  
161 out of 785 genes in the final analysis. Fold changes and p-values were calculated using the  
162 fast/recommended method as described in the nCounter® Advanced Analysis 2.0 User Manual.

163 Adjusted p-values were obtained using the Benjamini-Hochberg method of estimating false  
164 discovery rates. Genes were considered to be significant if they had a > +/- 1.5 fold change in  
165 expression and had an adjusted p-value <0.5. To compare the Log<sub>2</sub> Fold Change for genes  
166 between Dectin-2<sup>OE</sup> macrophages and Wild-type macrophages, multiple unpaired t-tests were  
167 performed using PRISM 9 Software (GraphPad Software, San Diego, CA) using the Log<sub>2</sub> Fold  
168 Change and Standard Error for the differentially expressed genes generated by the nSolver<sup>®</sup>  
169 Advance Analysis 2.0 software.

170

### 171 ***Cytokine Quantification***

172 1 x10<sup>5</sup> murine macrophages (immortalized or BMDM) were plated in triplicate in tissue culture  
173 treated 48-well plates and stimulated overnight with FLP or fungal germlings at the indicated  
174 target-to-effector ratios. Supernatants were collected for cytokine analysis using ELISA  
175 (Duoset, R&D Systems, Minneapolis, MN) and read using an i3X Spectrophotometer (Molecular  
176 Devices, LLC, San Jose, CA). Results were analyzed using PRISM9 software (GraphPad  
177 Software, San Diego, CA).

178 To quantify pulmonary cytokines, mouse lungs were dissected at the indicated time post-  
179 infection with either PBS or *A. fumigatus* strain CEA10. Lungs were removed and placed into 2  
180 mL of PBS and homogenized (Omni Tissue Homogenizer, Omni International, Kennesaw, GA)  
181 for 2 minutes each and then frozen at -80°C. At the time of analysis, lung homogenates were  
182 thawed and then centrifuged at 13,000 rpm x 10 minutes to pellet cellular debris. Supernatants  
183 were used for cytokine analysis using the Biolegend<sup>®</sup> LEGENDplex™ Mouse Anti-virus  
184 Response Panel containing (IFN-γ, CXCL1 (KC), TNFα, CCL2 (MCP-1), IL-12p70, CCL5  
185 (RANTES), IL-1β, IP-10 (CXCL10), GM-CSF, IL-10, IFN-β, IFN-α, IL-6) according to the  
186 manufacturers instructions and analyzed using the LEGENDplex™ Data Analysis Software  
187 Suite. CXCL2 concentration was analyzed using ELISA (Duoset, R&D Systems, Minneapolis,  
188 MN) and read using an i3X Spectrophotometer (Molecular Devices, LLC, San Jose, CA). TNFα



189 concentrations were confirmed using ELISA (Duoset, R&D Systems, Minneapolis, MN). Results  
190 were analyzed using PRISM9 software (GraphPad Software, San Diego, CA).

191

### 192 ***Immunophenotyping of pulmonary infiltrates***

193 Wildtype or Dectin-2<sup>-/-</sup> mice were infected with 4 x 10<sup>7</sup> conidia of *A. fumigatus* strain CEA10  
194 through oropharyngeal inhalation. Each experiment consisted of at least 7 wild-type and 7  
195 Dectin-2<sup>-/-</sup> mice infected with CEA10 *Aspergillus* and 5 mock infection (PBS only) control per  
196 mouse line. Mice were euthanized at 48 hours post-infection and immunophenotyping was  
197 performed as previously described(8). Briefly, lungs were perfused with PBS through cardiac  
198 puncture to flush intravascular cells. Lungs were excised, placed into Digestion Solution (38 mg  
199 Collagenase Type I and 100 U DNase I in 100 ml RPMI 1640), finely minced using scissors and  
200 incubated for 1 hour with shaking at 37°C. After 1 hour, 800 ml of 0.5 M EDTA was added to  
201 each sample to stop the collagenase activity. Lung samples were passed through a 70 µm  
202 filter, pelleted, resuspended in a 40% Percoll-RPMI solution, and under-layered with a 67%  
203 Percoll-RPMI solution. Samples were centrifuged at 650 x g for 20 minutes and leukocytes  
204 were collected at the interface between layers and washed twice with FACS buffer (PBS with  
205 2% FBS). Cells were counted and 1 – 2 x 10<sup>6</sup> cells were stained for flow cytometry analysis. Fc  
206 block (anti-Mouse CD16/CD32, Thermo Fisher Scientific, Rockford, IL, 14-0161-85) was added  
207 to cells at 1:100 dilution and incubated at room temperature for 15 minutes. Cells were then  
208 labeled with a mixture of the following fluorophore-conjugated antibodies for 1 hour at 4°C (all  
209 antibodies are from Biolegend, San Diego, CA unless otherwise noted): anti-CD45 BV605  
210 (Biolegend, 103139), anti-CD90.2 BV786 (Biolegend, 105331), anti-CD19 PE-Dazzle  
211 (Biolegend, 115553), anti-CD4 BV510 (Biolegend, 100559), anti-CD8 APC FIRE (Biolegend,  
212 100765), anti-Siglec-F APC (Biolegend, 155507), anti-Ly6G AF 488 (Biolegend, 127625), anti-  
213 Ly6C BV510 (Biolegend, 128033), anti-I-A/I-E AF700 (Biolegend, 107622), anti-NCR1 BV421  
214 (Biolegend, 137611), anti-CD64 PE (Biolegend, 139303), anti-CD103 BV421 (Biolegend,

215 121421), anti-CD11b APC FIRE (Biolegend, 101261), anti-CD11c BV650 (Biolegend, 117339),  
216 anti-B220/CD45R PE (Biolegend, 103207), anti-TCR $\gamma\delta$  APC (Biolegend, 118115), and anti-  
217 TCR $\beta$  BV650 (Biolegend, 109251). Cells were washed with FACS buffer, and 7-AAD (Stem  
218 Cell Technologies, 75001.1) was added for live-dead cell staining. Flow cytometry was  
219 performed using BD FACSCelesta™ and analysis was performed using FlowJo 10 software  
220 (BD, Ashland, OR). All cells were first gated based on the following parameters : 7-AAD<sup>lo</sup>,  
221 CD45<sup>+</sup>, CD90.2<sup>-</sup>, CD19<sup>-</sup> and then were further gated using a previously described gating  
222 strategy to identify discrete immune cell populations (8).

223

#### 224 **Quantification of Fungal Burden in Lungs**

225 Wildtype or Dectin-2<sup>-/-</sup> mice were infected with 4 x 10<sup>7</sup> conidia of *A. fumigatus* strain CEA10  
226 through oropharyngeal inhalation under isoflurane anesthesia. Each experiment consisted of 5  
227 wild-type and 5 Dectin-2<sup>-/-</sup> mice infected with CEA10 *Aspergillus* and one mock infection (PBS  
228 only) control per mouse line. After 48 hours lungs were extracted, frozen at -80°C, and  
229 lyophilized overnight. Freeze-dried tissue was homogenized using 0.5 mm glass beads with a  
230 TissueLyser LT homogenizer (Qiagen, Germantown, MD) to create a fine powder. DNA was  
231 extracted from the homogenized tissue using the E.Z.N.A Fungal DNA Extraction Kit (Omega  
232 Bio-tek, Norcross, GA). The total quantity of DNA extracted from each sample was quantified  
233 using a NanoDrop™ One Microvolume UV-Vis Spectrophotometer (Thermo Fisher Scientific,  
234 Rockford, IL). Fungal DNA in each sample was quantified using qPCR. A standard curve was  
235 created using *A. fumigatus* genomic DNA and consisted of 10-fold serial dilutions from 1 pg to  
236 100 ng. 500 ng of sample DNA was analyzed per reaction and each sample was analyzed in  
237 triplicate. The sequences for the amplification primers and dual-labeled fluorogenic  
238 hybridization probe for the *A. fumigatus* 18S rRNA gene were previously published(9). All three  
239 probes were synthesized by Integrated DNA Technologies (IDT, Research Triangle Park, NC).

240 Each 20  $\mu$ L qPCR contained TaqMan® Fast Advanced Master Mix (Thermo Fisher Scientific,  
241 Rockland, IL), 500 ng of sample DNA and 1  $\mu$ M each of forward primer, reverse primer and  
242 probe. Samples were run and analyzed using the Applied Biosystems™ 7500 Fast Real-Time  
243 PCR System (Thermo Fisher Scientific, Rockland, IL). The percent of fungal DNA in each  
244 sample was determined by dividing the quantified fungal DNA in each PCR by 500 ng (input  
245 DNA per sample). The total DNA obtained from each lung sample was multiplied by the percent  
246 fungal DNA to obtain the total fungal DNA/lung.

247

### 248 **Colony Forming Unit (CFU)**

249 Wildtype or Dectin-2<sup>-/-</sup> mice were infected with  $4 \times 10^7$  conidia of *A. fumigatus* strain CEA10  
250 through oropharyngeal inhalation under isoflurane anesthesia. Each experiment consisted of 5  
251 wild-type and 5 Dectin-2<sup>-/-</sup> mice infected with CEA10 *Aspergillus* and one mock infection (PBS  
252 only) control per mouse line. After 48 hours lungs were extracted and placed into conical tubes  
253 containing sterile PBS. The weight of each tube pre- and post- lung addition was recorded to  
254 determine the weight of the tissue. The lungs were homogenized (Omni Tissue Homogenizer,  
255 Omni International, Kennesaw, GA) for 2 minutes each and then serial dilutions were performed  
256 and plates onto SBD agar. Plates were incubated for 48 hours at 30°C and colonies were  
257 counted. Data are reported at the number of colony forming units per gram of tissue. There was  
258 no growth from PBS only control mice.

259

### 260 ***In vivo Aspergillus survival model***

261 Wild-type C57BL/6 mice or Dectin-2<sup>-/-</sup> mice were immunosuppressed with 40 mg/kg  
262 subcutaneous triamcinolone acetonide (Kenalog®-10, Bristol-Myers Squibb, New York,  
263 NY) starting the day prior to infection and every 7 days thereafter. The mice were  
264 infected with  $2.4 \times 10^4$  CEA10 conidia intranasally under isoflurane anesthesia. For each

265 experiment 10 mice were infected with CEA10 and 3 mice were treated with PBS only  
266 per genotype. Mice were monitored twice daily for the first 5 days of the experiment and  
267 then daily thereafter. Mice were assessed based upon a 12-point scale to determine  
268 when an individual animal should be euthanized due to illness and removed from the  
269 study. This was developed in conjunction with the MGH IACUC and includes the  
270 following symptoms and points assigned to each in parentheses: hunched posture (3),  
271 ruffled and/or matted fur (3), shivering (3), abnormal breathing (increased respiratory  
272 rate) (12), 75% reduction in activity compared to controls (3), inactivity leading to  
273 inability to acquire food or water (12), and barrel rolling (12). If any animal reaches 12  
274 points, they are humanely euthanized and counted as a death for the purposes of  
275 survival analysis. All animal experiments were approved under the MGH IACUC  
276 protocol #2008N000078.

277

278

#### SUPPLEMENTAL REFERENCES

279

- 280 1. Tam JM, Mansour MK, Khan NS, Yoder NC, Vyas JM. 2012. Use of fungal  
281 derived polysaccharide-conjugated particles to probe Dectin-1 responses in  
282 innate immunity. *Integr Biol (Camb)* 4:220-7.
- 283 2. Mansour MK, Tam JM, Khan NS, Seward M, Davids PJ, Puranam S, Sokolovska  
284 A, Sykes DB, Dagher Z, Becker C, Tanne A, Reedy JL, Stuart LM, Vyas JM.  
285 2013. Dectin-1 activation controls maturation of beta-1,3-glucan-containing  
286 phagosomes. *J Biol Chem* 288:16043-54.
- 287 3. Wang H, LeBert V, Hung CY, Galles K, Saijo S, Lin X, Cole GT, Klein BS,  
288 Wüthrich M. 2014. C-type lectin receptors differentially induce th17 cells and

289 vaccine immunity to the endemic mycosis of North America. J Immunol  
290 192:1107-19.

291 4. Karttunen J, Sanderson S, Shastri N. 1992. Detection of rare antigen-presenting  
292 cells by the lacZ T-cell activation assay suggests an expression cloning strategy  
293 for T-cell antigens. Proc Natl Acad Sci U S A 89:6020-4.

294 5. Fiering S, Northrop JP, Nolan GP, Mattila PS, Crabtree GR, Herzenberg LA.  
295 1990. Single cell assay of a transcription factor reveals a threshold in  
296 transcription activated by signals emanating from the T-cell antigen receptor.  
297 Genes Dev 4:1823-34.

298 6. Robinson MJ, Osorio F, Rosas M, Freitas RP, Schweighoffer E, Gross O,  
299 Verbeek JS, Ruland J, Tybulewicz V, Brown GD, Moita LF, Taylor PR, Reis e  
300 Sousa C. 2009. Dectin-2 is a Syk-coupled pattern recognition receptor crucial for  
301 Th17 responses to fungal infection. J Exp Med 206:2037-51.

302 7. Rossner M, Yamada KM. 2004. What's in a picture? The temptation of image  
303 manipulation. J Cell Biol 166:11-5.

304 8. Wiesner DL, Merkhofer RM, Ober C, Kujoth GC, Niu M, Keller NP, Gern JE,  
305 Brockman-Schneider RA, Evans MD, Jackson DJ, Warner T, Jarjour NN, Esnault  
306 SJ, Feldman MB, Freeman M, Mou H, Vyas JM, Klein BS. 2020. Club Cell  
307 TRPV4 Serves as a Damage Sensor Driving Lung Allergic Inflammation. Cell  
308 Host Microbe 27:614-628 e6.

309 9. Bowman JC, Abruzzo GK, Anderson JW, Flattery AM, Gill CJ, Pikounis VB,  
310 Schmatz DM, Liberator PA, Douglas CM. 2001. Quantitative PCR assay to  
311 measure *Aspergillus fumigatus* burden in a murine model of disseminated

312 aspergillosis: demonstration of efficacy of caspofungin acetate. Antimicrob

313 Agents Chemother 45:3474-81.

314

315

316
