# Supplementary material for: The C-Type Lectin Receptor Dectin-2 Is a Receptor for Aspergillus fumigatus Galactomannan
Source: PubMed Central journal article supplement (PMC9973300; doi:10.1128/mbio.03184-22), 2023-01-04

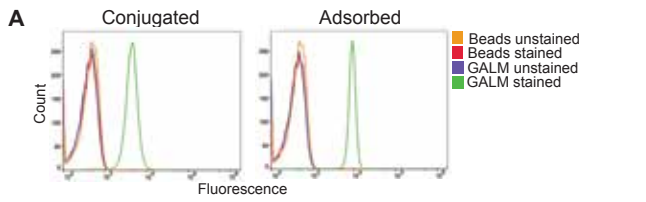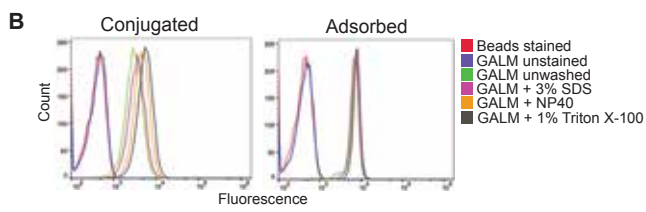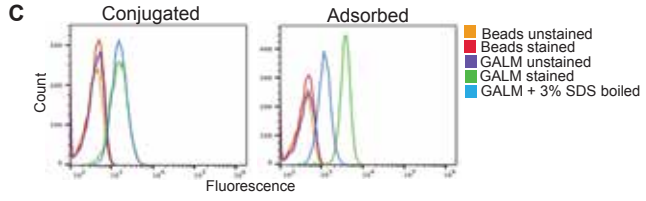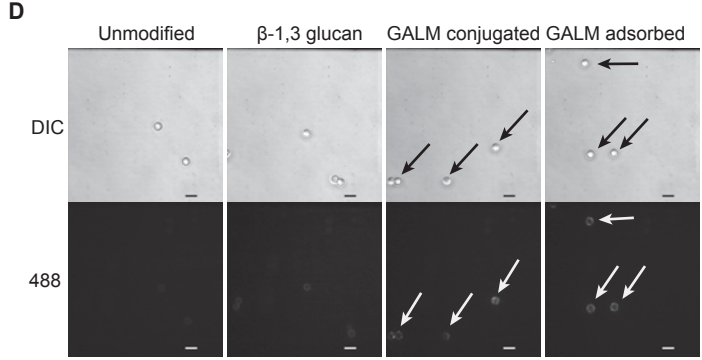

Supplement: mbio.03184-22-s0003.pdf [file mbio.03184-22-s0003.pdf]
