# Supplementary material for: The C-Type Lectin Receptor Dectin-2 Is a Receptor for Aspergillus fumigatus Galactomannan
Source: PubMed Central journal article supplement (PMC9973300; doi:10.1128/mbio.03184-22), 2023-01-04
Supplement: mbio.03184-22-s0005.pdf [file mbio.03184-22-s0005.pdf]

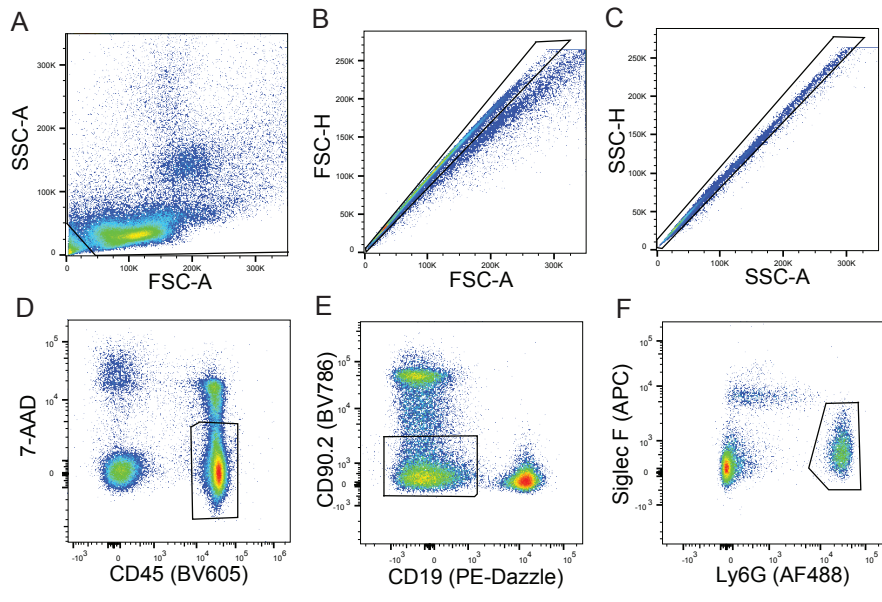

Supplemental Figure S3
